# Supplementary material for: A facile synthetic route toward phase-pure colloidal Cu2GeS3 nanostructures mediated through metal xanthate precursors
Source: Royal Society of Chemistry journal article supplement (doi:10.1039/d2nj04426a), 2022-01-01
Supplement: d2nj04426a1.pdf [file d2nj04426a1.pdf]

## A Simplistic Synthetic Route to Phase Pure Colloidal $\text{Cu}_2\text{GeS}_3$ Nanostructures Mediated Through Metal Xanthate Precursors

Alpa Y. Shah<sup>a,1</sup>, Gourab Karmakar<sup>a,b,1</sup>, Adish Tyagi<sup>a,b</sup>, G. Kedarnath<sup>a,b</sup>

<sup>a</sup>Chemistry Division, Bhabha Atomic Research Centre, Mumbai- 400 085 (India),

<sup>b</sup>Homi Bhabha National Institute, Anushaktinagar, Mumbai- 400 094 (India)

Email: [tyagia@barc.gov.in](mailto:tyagia@barc.gov.in), [kedar@barc.gov.in](mailto:kedar@barc.gov.in)

<sup>1</sup>Authors have contributed equally

### Figure captions

**Fig. S1.** EDS spectra of  $\text{Cu}_2\text{GeS}_3$  nanostructures.

**Fig. S2.** 2-D elemental mapping of  $\text{Cu}_2\text{GeS}_3$  nanostructures.

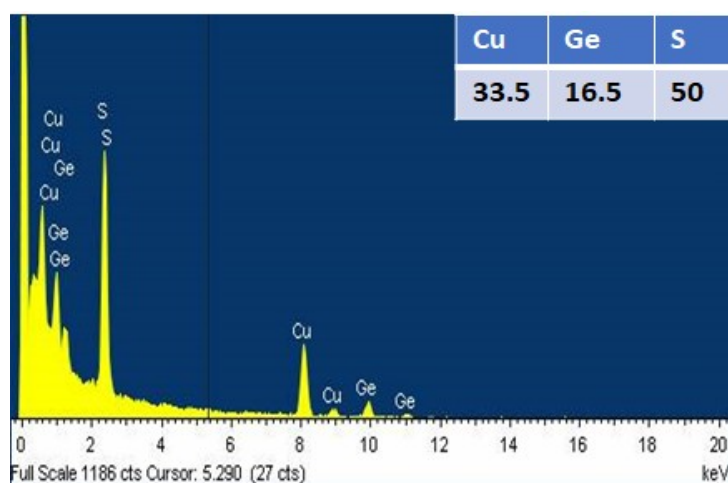

**Fig. S1.** EDS spectra of  $\text{Cu}_2\text{GeS}_3$  nanostructures.

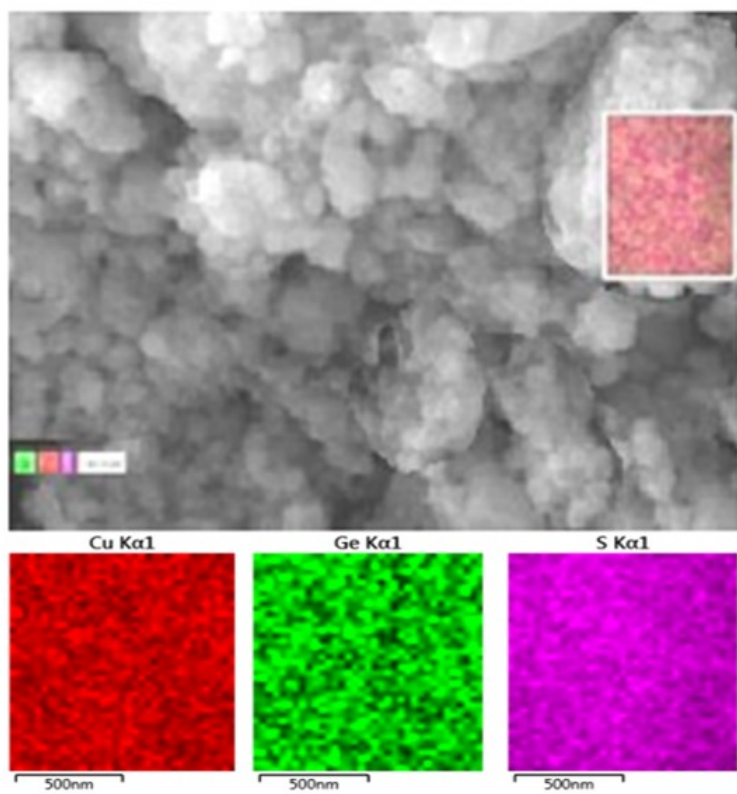

**Fig. S2.2-D** elemental mapping of  $\text{Cu}_2\text{GeS}_3$  nanostructures.
